## CORRECTIONS

### Affinity purification of 5-methylthioadenosine kinase and 5-methylthioribose/*S*-adenosylhomocysteine nucleosidase from *Klebsiella pneumoniae*

K. A. CORNELL, R. W. WINTER, P. A. TOWER and M. K. RISCOE

Volume 317 (1996), pp. 285–290

Owing to an error in printing, the title of the above paper was incorrect as published. The correct title reads as follows: “Affinity purification of 5-methylthioribose kinase and 5-methylthioadenosine/*S*-adenosylhomocysteine nucleosidase from *Klebsiella pneumoniae*”.

### The role of a $H^+$ -ATPase in the regulation of cytoplasmic pH in *Trypanosoma cruzi* epimastigotes

N. VANDERHEYDEN, G. BENAÏM and R. DOCAMPO

Volume 318 (1996), pp. 103–109

Figure 7 in the above paper was incorrect as printed. The correct figure appears below:

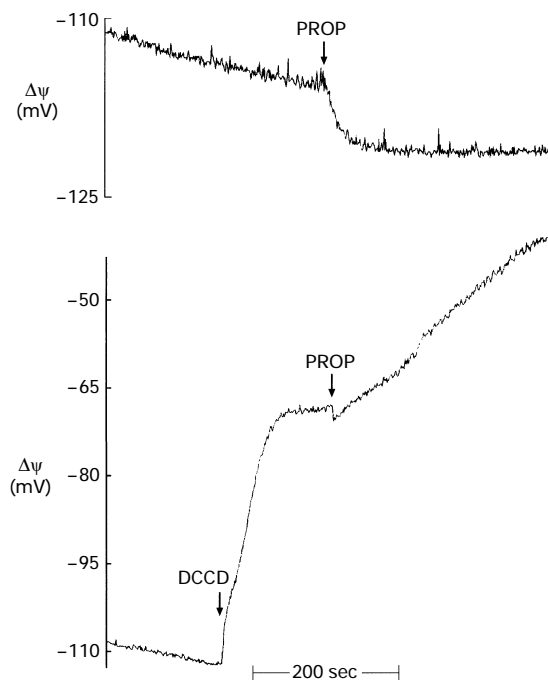

**Figure 7** Membrane potential ( $\Delta\Psi$ ) of epimastigotes

The cells were resuspended in standard buffer. Where indicated, 20 mM sodium propionate (PROP) or 100  $\mu$ M DCCD was added. Other conditions are described in the Materials and methods section. Traces are representative of three independent experiments conducted with separate cell preparations.

## **cDNA cloning, expression and chromosomal localization of the human sarco/endoplasmic reticulum $\text{Ca}^{2+}$ -ATPase 3 gene**

L. DODE, F. WUYTACK, P. F. J. KOOLS, F. BABA-AISSA, L. RAEYMAEKERS, F. BRIK, W. J. M. VAN DE VEN and R. CASTEELS

**Volume 318 (1996), pp. 689–699**

The surname of the sixth author was incorrectly shown on the title page of the above paper. The correct spelling is Briké.
